# Supplementary material
Source: Springer Nature journal article supplement (https://www.springermedizin.de/resource/supplementary/12936_2009_993_MOESM1_ESM.pdf/9548734)
Supplement: MOESM1 [file 9548734]

## SUPPLEMENTARY MATERIAL

### Assessing the burden of pregnancy associated malaria under changing transmission settings

Mario Recker<sup>1</sup>, Menno J Bouma<sup>2</sup>, Paul Bamford<sup>1</sup>, Sunetra Gupta<sup>1§</sup>, Andy P Dobson<sup>3</sup>

#### **Steady state under stable disease transmission ( $\lambda_s=0$ )**

Assuming a constant birth rate  $B$ , stable transmission ( $\lambda_s=0$ ) and ignoring other demographic factors, system (1) converges towards a steady-state equilibrium given by:

$$\begin{aligned} G := N_0 &= \frac{B}{m + \mu}, \quad N_i = mc^{i-1} \left( \frac{1-\lambda}{c + \mu} \right)^i N_0, \\ R_i &= \frac{cm\lambda(1-\alpha)}{c + \mu} \sum_{j=0..i} \left( \frac{c}{c + \mu} \right)^{i-j} N_j, \quad P = \frac{c}{\mu} (R_H + (1-\alpha\lambda)N_H), \end{aligned} \quad (2)$$

where capital letters denote equilibrium values. Within this framework we define excess morbidity,  $E$ , simply by the rate pregnant women move out of the susceptible classes  $g$  and  $n_i$  multiplied by the probability of contracting PAM,  $\lambda$ ; that is

$$E = E_p + E_M \quad \text{with} \quad E_p = m\lambda G, \quad E_M = \sum_{i=1..H} E_i = \sum_{i=1..H} c\lambda N_i \quad (3)$$

where  $E_p$  and  $E_M$  denote excess morbidity of the primi- and multigravidae classes, respectively.

#### **Maximum in excess morbidity in the multigravidae classes**

From Figure 5 (main text) it is clear that the excess morbidity within the multigravidae class assumes a local maximum. From (3) and (4) we find  $E_i^{\max}$  exactly when:

$$\frac{\partial}{\partial \lambda} E_i = \frac{\partial}{\partial \lambda} (c\lambda N_i) = 0 \quad \Leftrightarrow \quad \lambda_i^{\max} = \frac{1}{1+i}. \quad (4)$$

( $\lambda = 0$  and  $\lambda = 1$  are the local minima.) This means that the highest impact of PAM on senior gravid women occurs at lower levels of transmission than on women in earlier pregnancies. And because  $E_i^{\max}$  is a decreasing function in  $i$ , the total excess in morbidity from multigravidae,  $E_M^{\max} \left( = \sum_{i=1..H} E_i^{\max} \right)$ , is observed at intermediate levels of transmission intensity. Unfortunately, the exact value of  $\lambda^{\max}$  requires solving a polynomial of degree  $H$  but we can find a good approximation in:

$$\lambda^{\max} \approx \sum_{i=1..H} a^i \lambda_i^{\max} / \sum_{i=1..H} a^i, \quad (5)$$

with  $a = c/c + \mu$ . As such,  $\lambda^{\max}$  depends on the average number of pregnancies per female,  $H$ , and, to a smaller degree, on the duration of the period between consecutive pregnancies,  $c$ . Therefore, as the lifetime number of pregnancies increases, the maximum impact of PAM induced excess morbidity occurs at lower transmission intensities.
